# Supplementary material
Source: HighWire-hosted journal article supplement (https://www.cmajopen.ca/highwire/filestream/89482/field_highwire_adjunct_files/0/open-2022-0083-1-at.pdf)
Supplement: open-2022-0083-1-at.pdf [file open-2022-0083-1-at.pdf]

## Appendix 1: Screening questions for telemedicine interview participants

|                                             |                                                                                                                                                                                         |
|---------------------------------------------|-----------------------------------------------------------------------------------------------------------------------------------------------------------------------------------------|
| Name:                                       |                                                                                                                                                                                         |
| Quebec health insurance                     | <input type="checkbox"/> Yes <input type="checkbox"/> No                                                                                                                                |
| Age group                                   | <input type="checkbox"/> Young <input type="checkbox"/> Middle-Aged <input type="checkbox"/> Older                                                                                      |
| Gender                                      | <input type="checkbox"/> Man <input type="checkbox"/> Woman                                                                                                                             |
| Language                                    | <input type="checkbox"/> English <input type="checkbox"/> French <input type="checkbox"/> Other:                                                                                        |
| Access to internet                          | <input type="checkbox"/> Yes <input type="checkbox"/> No                                                                                                                                |
| Immigrant status                            | <input type="checkbox"/> Canadian-born <input type="checkbox"/> Immigrant <10 years<br><input type="checkbox"/> Immigrant > 10 years                                                    |
| Family structure                            | <input type="checkbox"/> Single person <input type="checkbox"/> Extended-Two Generations<br><input type="checkbox"/> Nuclear Family (including couples) <input type="checkbox"/> Other: |
| Whether household member needed healthcare? | <input type="checkbox"/> Yes <input type="checkbox"/> No                                                                                                                                |
| Where is your family physician located?     | X:                                                                                                                                                                                      |
| Preferred contact time                      | <input type="checkbox"/> Week afternoon <input type="checkbox"/> Week early evening <input type="checkbox"/> Weekend morning                                                            |
| Preferred Interview Modality:               | <input type="checkbox"/> Phone <input type="checkbox"/> In person <input type="checkbox"/> Video conference                                                                             |
| Phone number or email address:              |                                                                                                                                                                                         |
| Comments or observations:                   | X:                                                                                                                                                                                      |

Data Collector: \_\_\_\_\_

Page \_\_
